# Supplementary material for: Frailty Prevalence And Evaluation Of The FRAIL Scale Questionnaire In Patients with Inflammatory Bowel Disease
Source: Research Square preprint supplement (doi:10.21203/rs.3.rs-5815707/v1), 2025-01-17
Supplement: Supplementary file 1 [file 19757a2e71e38bb9a5efc01d.pdf]

#

# Patient Questionnaire

(Frailty Phenotype and FRAIL Scale)

Patient Name: \_\_\_\_\_

Date: \_\_\_\_ / \_\_\_\_ / \_\_\_\_

Provider initials: \_\_\_\_\_

## **Frail Phenotype Questionnaire**

### **Exhaustion:**

**1.a. In the past month, on the average, have you been feeling unusually tired during the day?**

Yes ☐ No ☐ Refused ☐ Don't Know ☐

**1.b. If yes, have you been feeling unusually tired:**

- ☐ All of the time
- ☐ Most of the time
- ☐ Some of the time
- ☐ Refused / Don't Know

**2.a. In the past month, on the average, have you been feeling unusually weak during the day?**

Yes ☐ No ☐ Refused ☐ Don't Know ☐

**2.b. If yes, have you been feeling unusually tired:**

- ☐ All of the time
- ☐ Most of the time
- ☐ Some of the time
- ☐ Refused / Don't Know

**3. From a scale of 0 - 10, where 0 is no energy and 10 is the most energy that you ever had, please give a number between 0 - 10 that describes your usual energy level while awake in the last month: \_\_\_\_\_**

**Activity:**

**During the past two weeks have you walked for exercise?**

Yes ☐ No ☐ Refused ☐ Don't Know ☐

How many times in the last 2 weeks? \_\_\_\_\_

How much time on average per occasion? \_\_\_\_\_ Hours \_\_\_\_\_ Minutes

**During the past two weeks have you done moderately strenuous household chores, like scrubbing and vacuuming?**

Yes ☐ No ☐ Refused ☐ Don't Know ☐

How many times in the last 2 weeks? \_\_\_\_\_

How much time on average per occasion? \_\_\_\_\_ Hours \_\_\_\_\_ Minutes

**During the past two weeks have you done moderately strenuous outdoor chores, like mowing or raking the lawn, shoveling snow or working in the garden?**

Yes ☐ No ☐ Refused ☐ Don't Know ☐

How many times in the last 2 weeks? \_\_\_\_\_

How much time on average per occasion? \_\_\_\_\_ Hours \_\_\_\_\_ Minutes

**During the past two weeks have you been dancing?**

Yes ☐ No ☐ Refused ☐ Don't Know ☐

How many times in the last 2 weeks? \_\_\_\_\_

How much time on average per occasion? \_\_\_\_\_ Hours \_\_\_\_\_ Minutes

**During the past two weeks have you been bowling?**

Yes ☐ No ☐ Refused ☐ Don't Know ☐

How many times in the last 2 weeks? \_\_\_\_\_

How much time on average per occasion? \_\_\_\_\_ Hours \_\_\_\_\_ Minutes

**During the past two weeks have you participated in any regular exercise program, such as stretching or strengthening exercises, swimming or any other regular exercise program?**

Yes ☐ No ☐ Refused ☐ Don't Know ☐

How many times in the last 2 weeks? \_\_\_\_\_

How much time on average per occasion? \_\_\_\_\_ Hours \_\_\_\_\_ Minutes

Handedness: Right                      Left

**Weakness:**

Grip Strength: \_\_\_\_\_ kg, \_\_\_\_\_ kg, \_\_\_\_\_ kg

Average: \_\_\_\_\_ kg

**Slowness:**

Time to walk 4 meters: \_\_\_\_\_ s, \_\_\_\_\_ s

Height:

## **FRAIL Scale Questionnaire**

### **Fatigue:**

- How much of the time during the past 4 weeks did you feel tired?

|                                                     |                                                                                   |
|-----------------------------------------------------|-----------------------------------------------------------------------------------|
| <b>All</b> of the time, <b>Most</b> of the time = 1 | <b>Some</b> of the time, <b>A little</b> of the time, <b>None</b> of the time = 0 |
|-----------------------------------------------------|-----------------------------------------------------------------------------------|

### **Resistance:**

- By yourself and not using aids, do you have any difficulty walking up 10 steps without resting?

|                                                     |                                                                                   |
|-----------------------------------------------------|-----------------------------------------------------------------------------------|
| <b>All</b> of the time, <b>Most</b> of the time = 1 | <b>Some</b> of the time, <b>A little</b> of the time, <b>None</b> of the time = 0 |
|-----------------------------------------------------|-----------------------------------------------------------------------------------|

### **Ambulation:**

- By yourself and not using aids, do you have any difficulty walking several hundred yards?

|                                                     |                                                                                   |
|-----------------------------------------------------|-----------------------------------------------------------------------------------|
| <b>All</b> of the time, <b>Most</b> of the time = 1 | <b>Some</b> of the time, <b>A little</b> of the time, <b>None</b> of the time = 0 |
|-----------------------------------------------------|-----------------------------------------------------------------------------------|

### **Illness:**

- Did a doctor ever tell you that you have:

|                                               |                                       |                                                   |                                         |
|-----------------------------------------------|---------------------------------------|---------------------------------------------------|-----------------------------------------|
| <input type="checkbox"/> Hypertension         | <input type="checkbox"/> Diabetes     | <input type="checkbox"/> Cancer                   | <input type="checkbox"/> Angina         |
| <input type="checkbox"/> Chronic Lung Disease | <input type="checkbox"/> Heart Attack | <input type="checkbox"/> Congestive Heart Failure | <input type="checkbox"/> Kidney Disease |
| <input type="checkbox"/> Asthma               | <input type="checkbox"/> Arthritis    | <input type="checkbox"/> Stroke                   | (0 - 4) = 0<br>(5 - 11) = 1             |

**Loss of weight:**

- How much do you weigh with your clothes on and without shoes?  
[current weight]: \_\_\_\_\_ lb
- One year ago, how much did you weigh without your shoes and with  
your clothes on? [weight 1 year ago]: \_\_\_\_\_ lb

Percent weight change is computed as:

$((\text{weight last year} - \text{current weight}) / \text{weight last year}) * 100\%$ ,  
>5% weight loss unintentionally is significant (= 1)

**FRAIL Scale Results:**

non-frail: 0

pre-frail: 1 - 2

frail: 3 - 5
